# Supplementary material
Source: PubMed Central journal article supplement (PMC2590703)
Supplement: M806337200_1.pdf [file M806337200_1.pdf]

## Supplementary material for:

### ASCORBATE PEROXIDASE 1 Plays a Key Role in the response of *Arabidopsis thaliana* to Stress Combination.

#### **Proteomic analysis of plants subjected to drought, heat stress, or a combination of drought and heat stress.**

**Protein extraction.** Plant tissue (400 mg) was flash-frozen and grounded in liquid nitrogen. Grounded tissue was re-suspended in 1 ml of buffer containing 50 mM Tris-HCl (pH-8); 0.5 M sucrose; 1 mM MgCl<sub>2</sub>; 10 mM EDTA; 10 mM EGTA; 5 mM DTT and protease inhibitor cocktail for plant cell and tissue extracts (Sigma, St Louis; MO). Extracts were centrifuged in a bench top centrifuge (1,500 x g, 1 min) to remove cell debris and then centrifuged at 150,000 x g for 30 min. The supernatant was collected and proteins were precipitated by adding TCA (25% final concentration), incubating for 10 min on ice and centrifugation (18,000 x g, 10 min). Pellets were washed twice with cold acetone, air dried for 5 min, re-suspended in 260 µl DeStreak Rehydration Solution (GE Healthcare, Piscataway; NJ), gently vortexed for 90 min, and sonicated in a water bath sonicator for 10 min. All samples were spun at 16,000 x g for 10 minutes and supernatants were recovered. The protein content of the supernatants was determined using the EZQ protein assay (Invitrogen, Carlsbad; CA). Extracts were diluted so that they were normalized to the lowest protein concentration.

**Two-dimensional gel electrophoresis.** All reagents and solutions for 2-D electrophoresis, IPG strips, and SDS polyacrylamide gels were obtained from Bio-Rad (Hercules, CA), except as noted. 195 µl of each extract was loaded onto a 3-10L 11 cm IPG strip by overnight passive rehydration. Isoelectric focusing was carried out on a Bio-Rad Protean IEF cell using a program as follows: 250 V, linear ramp for 20 minutes; 8000 V, linear ramp for 2 hours 30 minutes; and 8000 V for a total of 20,000 Vhr (all steps with a maximum current of 50 µA per gel). Strips were stored at -80°C, then thawed and incubated twice for 10 minutes each in 8M urea, 2% SDS, 0.05 M Tris-HCl, pH 8.8, 20% glycerol. The first incubation contained 2% DTT and the second contained 2.5% iodoacetamide. The strips were then layered on 4-20% Criterion Tris-HCl gradient gels and embedded in place with 0.5% agarose, along with BenchMark Protein Ladder molecular weight markers (Invitrogen, Carlsbad; CA). Electrophoresis was performed at a constant current of 200 mA until the dye front ran off the gel. Gels were stained overnight with Bio-Safe Coomassie or Sypro Ruby (BioRad, Hercules; CA).

**Imaging, comparison of and sampling of protein spots.** Stained gels were imaged on a VersaDoc imager; images of gels were compared using PDQuest version 8.0.1 software and spots were cut using the EXQuest spot cutter (all from BioRad, Hercules; CA). For quantification, all 12 gels (3 repeats each of control untreated, drought-stressed, heat-stressed, or drought and heat stress combination), were used in one match set and normalized to total intensity of all valid spots. Protein spots that either increased or decreased by at least two fold, in at least two of the three biological replications, were then cut from the gels and analyzed by MALDI-TOF-TOF. The detection threshold for our analysis was, on average, 0.005% of total protein loaded. Protein spots that either increased or decreased in intensity by at least two fold, in at least two of the three biological replications, were then cut from the gels and analyzed by MALDI-TOF-TOF

**Protein digestion and mass spectrometry.** Spots were digested using Investigator<sup>TM</sup> Proprep<sup>TM</sup> (Genomic Solutions, Ann Arbor; MI), we used a previously described protocol (1) with some modifications. Samples were washed twice with 25mM ammonium Bicarbonate

(ABC) and 100% acetonitrile, reduced and alkylated using 10 mM DTT and 100 mM Iodoacetamide and incubated with 75ng Trypsin for 6 hrs at 37° C (trypsin was dissolved in 200 µl of 0.3% formic acid (aq) immediately prior to initiation of the digestion protocol).

Samples were prepared and spotted onto a MALDI (Matrix Assisted laser Desorption Ionization) target with ZipTipu-C18 (Millipore, Billerica; MA). Samples were aspirated and dispensed 3 times and eluted with conditioning solution (70% ACN, 0.2% formic acid) containing 5mg/ml MALDI matrix ( $\alpha$ -Cyano-4-hydroxycinnamic acid) and 10mM ammonium phosphate, 0.5µl were spotted onto the MALDI target.

Mass Spectrometry. All mass spectrometric data was collected using an ABI 4700 MALDI TOF/TOF (Applied Biosystems, Foster City; CA). The data was acquired in reflector mode from a mass range of 700 – 4000 Daltons and 1250 laser shots were averaged for each mass spectrum. Each sample was internally calibrated if both the 842.51 and 2211.10 ions from trypsin autolysis were present. If both ions were not found we used the instrument's default calibration. The eight most intense ions from the MS analysis, which were not on the exclusion list, were subjected to MS/MS. For MS/MS analysis the mass range was 70 to precursor ion with a precursor window of -1 to 3 Daltons with an average 5000 laser shots for each spectrum. The data were stored in an Oracle database.

**Database Search.** The data was extracted from the Oracle database and a peak list was created by GPS Explorer software (Applied Biosystems, Foster City; CA) from the raw data generated from the ABI 4700. This peak list was based on signal to noise filtering and an exclusion list and included de-isotoping. The resulting file was then searched by Mascot (Matrix Science, Boston; MA) against an *Arabidopsis thaliana* database. A tolerance of 20 ppm was used if the sample was internally calibrated and 200 ppm tolerance if the default calibration was applied. Protein identification was validated by the following criteria: greater than 20 ppm mass accuracy on all MS ions and all ions in at least two MS/MS spectra, which were not modified, had to be accounted for.

### Legends for Tables:

**Supplementary Table 1.** List of proteins identified by 2D-gels in plants subjected to drought (D), heat (H), or a combination of drought and heat stress (D+H) as described in the experimental procedure section of the manuscript. Proteins, with their corresponding spot numbers, were grouped based on their response to the various stresses. The protein score, confidence (Conf.) and peptide number (Pep.) are based on the GPS Mascot analysis. Proteins are identified by their SwissPort ID and the corresponding gene-annotation (downloaded from TAIR ([www.arabidopsis.org](http://www.arabidopsis.org))). Localization (Local.) of the protein was determined by the TAIR and PSORT predictions ([www.arabidopsis.org](http://www.arabidopsis.org) and <http://psort.ims.u-tokyo.ac.jp/form.html> respectively). Localizations includes chloroplasts (chl), mitochondria (mit), cytoplasm (cyt), various membranal systems (mem), nucleus (nuc), endoplasmic reticulum (er), extra cellular proteins (ex), peroxizomes (per), microbody (mic), cell wall (wall) and unknown (unk). Experimental details are described above. Abbreviations: NC, no change in protein accumulation; DN, decrease in protein accumulation; UP, increase in protein accumulation.

**Supplementary Table 2.** Proteins that specifically accumulate in plants during a combination of drought and heat stress. Proteins are listed with their corresponding spot numbers. Log fold change of the corresponding transcript is shown based on ATH1 experiments reported previously (2). Other details as in Supplementary table 1.

## REFERECES:

1. Rosenfeld, J., Capdevielle, J., Guillemot, J. C., and Ferrara, P. (1992) *Anal Biochem* **203**, 173-179
2. Rizhsky, L., Liang, H., Shuman, J., Shulaev, V., Davletova, S., and Mittler, R. (2004) *Plant Physiol* **134**, 1683-1696

**Supplementary Table 1.** List of proteins identified by 2D-gels in plants subjected to drought (D), heat (H), or a combination of drought and heat stress (D+H).

| spot number | gene             | SwissPort | score      | conf.       | # of peptides | local.            | protein                                                    |
|-------------|------------------|-----------|------------|-------------|---------------|-------------------|------------------------------------------------------------|
| 107         | At4g39730        | O65660    | 93         | 99          | 5             | chl               | lipid-associated family protein                            |
| 108         | At4g39730        | O65660    | 180        | 100         | 2             | chl               | lipid-associated family protein                            |
| 202         | At5g37780        | P25854    | 137        | 100         | 6             | unk               | calmodulin-1/4 (CAM1)                                      |
| 708         | AtCg00490        | O03042    | 431        | 100         | 18            | chl               | Rubisco LSU                                                |
| 709         | AtCg00490        | O03042    | 503        | 100         | 24            | chl               | Rubisco LSU                                                |
| <b>1101</b> | <b>At1g32470</b> | Q9LQL0    | <b>204</b> | <b>100</b>  | <b>5</b>      | <b>mit.</b>       | <b>glycine cleavage system H protein</b>                   |
| <b>1101</b> | <b>At2g22170</b> | Q9SIE7    | <b>142</b> | <b>100</b>  | <b>6</b>      | <b>cyt.</b>       | <b>lipid-associated family protein,</b>                    |
| 1601        | At5g10760        | Q9LEW3    | 149        | 100         | 8             | mem               | aspartyl protease family protein                           |
| 1707        | At3g54050        | P25851    | 251        | 100         | 11            | chl               | Fructose-1,6-bisphosphatase                                |
| 1904        | AT4g24280        | Q9STW6    | 424        | 100         | 18            | chl               | HSP70                                                      |
| <b>2004</b> | <b>At1g67040</b> | Q9FZH7    | <b>231</b> | <b>100</b>  | <b>6</b>      | <b>cyt.</b>       | <b>expressed protein</b>                                   |
| <b>2004</b> | <b>At5g38420</b> | P10797    | <b>240</b> | <b>100</b>  | <b>7</b>      | <b>chl.</b>       | <b>Rubisco Small subunit chain B2</b>                      |
| 2301        | At3g04790        | Q9S726    | 161        | 100         | 5             | chl               | ribose 5-phosphate isomerase-related                       |
| 2304        | At3g23600        | Q2V3T4    | 93         | 99          | 7             | cyt               | dienelactone hydrolase                                     |
| 2605        | At3g12780        | Q9LD57    | 75         | 96          | 8             | mit               | phosphoglycerate kinase                                    |
| 2801        | At2g28000        | P21238    | 467        | 100         | 26            | chl               | Cpn60                                                      |
| 2808        | AtCg00120        | P56757    | 753        | 100         | 24            | chl.              | ATP synthase alpha chain                                   |
| 3002        | At5g38420        | P10797    | 377        | 100         | 11            | chl.              | Rubisco Small subunit chain B2                             |
| 3108        | At2g21660        | Q03250    | 409        | 100         | 11            | nuc.              | Glycine-rich RNA binding protein GRP7                      |
| <b>3203</b> | <b>At3g14210</b> | Q9LJG3    | <b>75</b>  | <b>95</b>   | <b>5</b>      | <b>er</b>         | <b>Lipase/acylhydrolase; myrosinase-associated protein</b> |
| <b>3203</b> | <b>At5g16450</b> | Q9FFE0    | <b>106</b> | <b>100</b>  | <b>7</b>      | <b>er</b>         | <b>dimethylmenaquinone methyltransferase</b>               |
| 3204        | At2g43560        | Q22870    | 229        | 100         | 9             | chl               | Probable FKBP-type peptidyl-prolyl cis-trans isomerase     |
| 3205        | At1g06680        | Q42029    | 265        | 100         | 9             | chl               | Oxygen-evolving enhancer protein 2 (OEE2/PsbP)             |
| <b>3209</b> | <b>At3g25770</b> | Q9LS02    | <b>326</b> | <b>100</b>  | <b>10</b>     | <b>chl.</b>       | <b>AOC3 allene oxide cyclase</b>                           |
| <b>3209</b> | <b>At5g20630</b> | P94072    | <b>138</b> | <b>100</b>  | <b>2</b>      | <b>ext. cell.</b> | <b>GLP3 germin-like protein 3</b>                          |
| 3709        | AtCg00480        | P19366    | 513        | 100         | 18            | chl.              | ATP synthase beta subunit                                  |
| 3803        | AT5g26000        | P37702    | 137        | 100         | 13            | mem               | glycosyl hydrolase family 1 protein                        |
| 3804        | At1g55490        | P21240    | 247        | 100         | 15            | chl.              | CPN-60                                                     |
| 3806        | At5g26000        | P37702    | 427        | 100         | 21            | mem               | glycosyl hydrolase family 1 protein                        |
| 4007        | At1g67090        | P10795    | 219        | 100         | 7             | chl               | Rubisco SSU 1A                                             |
| <b>4305</b> | <b>At1g07890</b> | Q05431    | <b>307</b> | <b>100</b>  | <b>10</b>     | <b>cyt.</b>       | <b>APX1</b>                                                |
| <b>4305</b> | <b>At1g09130</b> | Q8L770    | <b>84</b>  | <b>99.4</b> | <b>7</b>      | <b>chl.</b>       | <b>ClpR3</b>                                               |
| 4307        | At1g07890        | Q05431    | 152        | 100         | 9             | cyt.              | APX1                                                       |
| <b>4307</b> | <b>At3g01500</b> | P27140    | <b>312</b> | <b>100</b>  | <b>12</b>     | <b>chl.</b>       | <b>CA1 (CARBONIC ANHYDRASE 1)</b>                          |
| <b>4504</b> | <b>At1g75280</b> | P52577    | <b>180</b> | <b>100</b>  | <b>13</b>     | <b>cyt.</b>       | <b>isoflavone reductase</b>                                |
| <b>4504</b> | <b>At2g43750</b> | P47999    | <b>257</b> | <b>100</b>  | <b>13</b>     | <b>chl.</b>       | <b>cysteine synthase</b>                                   |
| <b>4504</b> | <b>At3g47520</b> | Q9SN86    | <b>110</b> | <b>100</b>  | <b>10</b>     | <b>chl.</b>       | <b>NAD-malate dehydrogenase</b>                            |
| 4509        | At3g47520        | Q9SN86    | 249        | 100         | 14            | chl               | NAD-dependent malate dehydrogenase                         |

|             |                  |        |            |            |           |            |                                                                              |
|-------------|------------------|--------|------------|------------|-----------|------------|------------------------------------------------------------------------------|
| <b>4605</b> | <b>At4g23600</b> | Q9SUR6 | <b>241</b> | <b>100</b> | <b>18</b> | <b>mem</b> | <b>COR13 cystathionine beta-lyase</b>                                        |
| 4802        | At3g16850        | Q94C86 | 77         | 97         | 5         | mem        | glycoside hydrolase family 28 protein / polygalacturonase (pectinase)        |
| <b>4805</b> | <b>At3g16850</b> | Q94C86 | <b>82</b>  | <b>99</b>  | <b>8</b>  | <b>mem</b> | <b>glycoside hydrolase family 28 protein / polygalacturonase (pectinase)</b> |
| <b>4805</b> | <b>At4g34200</b> | O49485 | <b>205</b> | <b>100</b> | <b>18</b> | <b>chl</b> | <b>D-3-phosphoglycerate dehydrogenase / 3-PGDH</b>                           |
| 4809        | At5g11670        | Q9LYG3 | 227        | 100        | 16        | cyt.       | AtNADP-ME2 (malic enzyme 2)                                                  |
| 5506        | At1g53240        | Q9ZP06 | 751        | 100        | 14        | mit.       | NAD dependent malate dehydrogenase                                           |
| 5702        | At1g23310        | Q2V4L7 | 594        | 100        | 29        | cyt.       | GGT1 (alanine-2 oxoglutarate aminotransferase 1 )                            |
| 6003        | At1g67090        | P10795 | 323        | 100        | 8         | chl        | Rubisco SSU 1A                                                               |
| 6008        | At5g20620        | P59263 | 431        | 100        | 10        | cyt        | polyubiquitin (UBQ4)                                                         |
| 6102        | At3g17020        | Q9LSP5 | 250        | 100        | 11        | mem        | universal stress protein (USP) family protein, similar to ENOD18             |
| 6511        | At1g13440        | Q56WJ4 | 248        | 100        | 9         | cyt        | glyceraldehyde 3-phosphate dehydrogenase, cytosolic                          |
| 6602        | At1g13440        | Q56WJ4 | 464        | 100        | 17        | mit.       | Glyceraldehyde 3-phosphate dehydrogenase, cytosolic                          |
| 6604        | At3g14210        | Q9LJG3 | 146        | 100        | 12        | mem        | myrosinase-associated protein                                                |
| 7405        | At3g12500        | P19171 | 194        | 100        | 5         | mem.       | Class I chitinase (Fragment)                                                 |
| 8304        | At3g11780        | Q9SF20 | 98         | 99         | 3         | unk        | MD-2-related lipid recognition domain-containing protein                     |

Drought-UP; Heat-DN; Drought+Heat-UP

|     |           |        |     |     |    |     |                                |
|-----|-----------|--------|-----|-----|----|-----|--------------------------------|
| 401 | At4g24770 | Q04836 | 368 | 100 | 10 | chl | cp31 RNA-binding protein RNP-T |
| 402 | At4g24770 | Q04836 | 288 | 100 | 10 | chl | cp31 RNA-binding protein RNP-T |

Drought-UP; Heat-NC; Drought+Heat-UP

|             |                  |        |            |             |           |             |                                                          |
|-------------|------------------|--------|------------|-------------|-----------|-------------|----------------------------------------------------------|
| 505         | At1g47128        | P43297 | 132        | 100         | 4         | mem         | cysteine proteinase (RD21A) / thiol protease             |
| 1102        | At2g35370        | P25855 | 356        | 100         | 7         | mit.        | GDCH glycine decarboxylase complex H protein             |
| 1801        | At5g53140        | Q94AT1 | 119        | 100         | 8         | mit         | Protein phosphatase 2C-like                              |
| 2505        | At3g55800        | P46283 | 309        | 100         | 19        | chl         | sedoheptulose-1,7-bisphosphatase (SBPase)                |
| <b>3102</b> | <b>At3g52960</b> | Q949U7 | <b>358</b> | <b>100</b>  | <b>7</b>  | <b>chl.</b> | <b>peroxiredoxin type 2</b>                              |
| <b>3102</b> | <b>At5g53490</b> | P81760 | <b>81</b>  | <b>98.8</b> | <b>5</b>  | <b>chl.</b> | <b>thylakoid lumenal 17.4 kDa protein</b>                |
| 3601        | AtCg00480        | P19366 | 167        | 100         | 10        | chl         | ATPB (ATPase $\beta$ -subunit)                           |
| <b>4603</b> | <b>At2g39730</b> | P10896 | <b>296</b> | <b>100</b>  | <b>11</b> | <b>chl</b>  | <b>Rubisco activase</b>                                  |
| <b>4603</b> | <b>At3g52180</b> | Q2V2SO | <b>240</b> | <b>100</b>  | <b>15</b> | <b>chl</b>  | <b>plant-specific protein tyrosine phosphatase (PTP)</b> |
| 5307        | At3g01500        | P27140 | 221        | 100         | 11        | chl         | carbonic anhydrase 1 (CA1)                               |
| 7212        | At4g11650        | P50700 | 158        | 100         | 7         | cyt.        | osmotin-like protein (OSM34)                             |

Drought-NC; Heat-UP; Drought+Heat-UP

|      |           |        |     |     |    |      |                                                              |
|------|-----------|--------|-----|-----|----|------|--------------------------------------------------------------|
| 206  | At1g75950 | Q39255 | 107 | 100 | 3  | unk  | SKP1-like (SCF E3 ubiquitin ligase)                          |
| 309  | At4g24770 | Q04836 | 159 | 100 | 8  | chl  | cp31 RNA-binding protein RNP-T                               |
| 2204 | At4g25200 | Q96331 | 383 | 100 | 9  | mit. | mitochondrial small heat shock protein (HSP23.6-M)           |
| 2207 | At3g46230 | P19036 | 159 | 100 | 8  | cyt. | HSP 17.4                                                     |
| 2403 | At5g66570 | P23321 | 408 | 100 | 18 | chl  | photosystem II oxygen-evolving complex protein 1 (OEE1/PsbO) |
| 2802 | At3g09440 | O65719 | 535 | 100 | 30 | cyt  | heat shock cognate 70 kDa protein 3 (HSC70-3)                |
| 3301 | At1g06680 | Q42029 | 604 | 100 | 9  | chl. | PsbP (OE23)                                                  |
| 3303 | At3g01500 | P27140 | 89  | 99  | 5  | chl  | carbonic anhydrase 1 (CA1)                                   |

|             |                  |        |            |            |           |            |                                               |
|-------------|------------------|--------|------------|------------|-----------|------------|-----------------------------------------------|
| 4201        | At3g62030        | P34791 | 642        | 100        | 13        | chl        | Peptidyl-prolyl cis-trans isomerase (CYP20-3) |
| <b>5302</b> | <b>At1g67090</b> | P10795 | <b>106</b> | <b>99</b>  | <b>8</b>  | <b>chl</b> | <b>Rubisco SSU 1A</b>                         |
| <b>5302</b> | <b>At4g09010</b> | P82281 | <b>320</b> | <b>100</b> | <b>12</b> | <b>chl</b> | <b>APX4</b>                                   |
| 5508        | At1g53240        | Q9ZP06 | 385        | 100        | 7         | mit        | malate dehydrogenase (NAD)                    |
| 6205        | At4g38740        | P34790 | 307        | 100        | 11        | cyt        | cytosolic cyclophilin (ROC1)                  |
| 6505        | At3g26650        | P25856 | 82         | 99         | 5         | chl        | glyceraldehyde 3-phosphate dehydrogenase A    |
| 6506        | At3g26650        | P25856 | 240        | 100        | 14        | chl        | glyceraldehyde 3-phosphate dehydrogenase A    |
| 7610        | At5g11420        | Q9LYE7 | 215        | 100        | 12        | mem        | expressed protein                             |
| 7802        | At1g20620        | Q42547 | 157        | 100        | 15        | per        | CAT3 (catalase)                               |

Drought-UP; Heat-UP; Drought+Heat-UP

|             |                  |        |            |             |           |             |                                                                       |
|-------------|------------------|--------|------------|-------------|-----------|-------------|-----------------------------------------------------------------------|
| <b>406</b>  | <b>At1g47128</b> | P43297 | <b>94</b>  | <b>99</b>   | <b>6</b>  | <b>mem</b>  | <b>cysteine proteinase (RD21A) / thiol protease</b>                   |
| <b>406</b>  | <b>At4g02450</b> | Q8L7U4 | <b>86</b>  | <b>99</b>   | <b>6</b>  | <b>unk</b>  | <b>glycine-rich protein</b>                                           |
| 1009        | At2g21660        | Q03250 | 173        | 100         | 6         | nuc         | ATGRP7 (Glycine-rich RNA-binding protein 7) (same as 3107)            |
| 1411        | At5g09650        | Q9LXC9 | 363        | 100         | 15        | chl         | inorganic pyrophosphatase                                             |
| 1503        | At1g23820        | Q9ZUB3 | 219        | 100         | 11        | mem         | SPDS1 Spermidine synthase                                             |
| 2905        | At5g36210        | Q9FG66 | 81         | 99          | 8         | chl         | expressed protein                                                     |
| 3201        | At3g62030        | P34791 | 81         | 98.8        | 2         | chl.        | peptidyl-prolyl cis-trans isomerase                                   |
| 3309        | At3g55440        | P48491 | 71         | 89.5        | 4         | cyt.        | Triosephosphate isomerase                                             |
| 3503        | At2g21330        | Q9SJU4 | 279        | 100         | 8         | chl.        | fructose-bisphosphate aldolase                                        |
| <b>3506</b> | <b>At2g21330</b> | Q9SJU4 | <b>189</b> | <b>100</b>  | <b>10</b> | <b>chl.</b> | <b>fructose-bisphosphate aldolase</b>                                 |
| <b>3506</b> | <b>At5g23120</b> | O82660 | <b>101</b> | <b>100</b>  | <b>8</b>  | <b>chl.</b> | <b>photosystem II stability/assembly factor, chloroplast (HCF136)</b> |
| <b>3506</b> | <b>At5g50850</b> | Q38799 | <b>93</b>  | <b>99.9</b> | <b>8</b>  | <b>mit.</b> | <b>pyruvate dehydrogenase E1 component beta subunit</b>               |
| 3507        | At1g79550        | Q9SAJ4 | 376        | 100         | 15        | cyt         | phosphoglycerate kinase                                               |
| 3604        | At1g32060        | P25697 | 431        | 100         | 12        | chl.        | phosphoribulokinase (PRK) / phosphopentokinase                        |
| <b>3702</b> | <b>At5g19770</b> | P20363 | <b>97</b>  | <b>100</b>  | <b>3</b>  | <b>cyt.</b> | <b>Tubulin alpha-3/alpha-5 chain</b>                                  |
| <b>3702</b> | <b>AtC00480</b>  | P19366 | <b>342</b> | <b>100</b>  | <b>10</b> | <b>chl.</b> | <b>ATP synthase beta subunit</b>                                      |
| 3807        | At1g55490        | P21240 | 329        | 100         | 21        | chl         | Cpn60 (GroEL)                                                         |
| 4002        | At1g67090        | P10795 | 296        | 100         | 9         | chl.        | Rubisco Small subunit chain 1A                                        |
| 4501        | At4g38970        | Q944G9 | 464        | 100         | 15        | chl.        | fructose-bisphosphate aldolase                                        |
| <b>5909</b> | <b>At3g14210</b> | Q9LJG3 | <b>80</b>  | <b>98</b>   | <b>12</b> | <b>mit</b>  | <b>glycine dehydrogenase</b>                                          |
| <b>5909</b> | <b>At4g35830</b> | Q42560 | <b>125</b> | <b>100</b>  | <b>16</b> | <b>cyt</b>  | <b>Aconitate hydratase</b>                                            |
| 6502        | At3g04120        | P25858 | 139        | 100         | 9         | cyt         | Glyceraldehyde 3-phosphate dehydrogenase                              |
| 6708        | At1g78850        | Q9ZVA4 | 262        | 100         | 13        | mem.        | curculin-like (mannose-binding) lectin family protein                 |
| 7402        | At3g16530        | Q9LK72 | 228        | 100         | 10        | mem.        | Lectin like protein                                                   |

Drought-DN; Heat-NC; Drought+Heat-DN

|             |                  |        |            |            |          |             |                                                             |
|-------------|------------------|--------|------------|------------|----------|-------------|-------------------------------------------------------------|
| 1704        | At3g54050        | P25851 | 299        | 100        | 13       | chl         | Fructose-1,6-bisphosphatase                                 |
| <b>2603</b> | <b>At2g39730</b> | P10896 | <b>122</b> | <b>100</b> | <b>5</b> | <b>chl.</b> | <b>ribulose bisphosphate carboxylase/oxygenase activase</b> |
| <b>2603</b> | <b>At3g12780</b> | Q9LD57 | <b>124</b> | <b>100</b> | <b>6</b> | <b>mem.</b> | <b>phosphoglycerate kinase</b>                              |
| 6508        | At1g13440        | Q56WJ4 | 515        | 100        | 18       | cyt         | glyceraldehyde 3-phosphate dehydrogenase, cytosolic         |
| 7404        | At1g76150        | Q8VYI3 | 152        | 100        | 11       | cyt.        | maoC-like hydratase domain-containing protein               |

|                                       |                  |        |            |            |           |             |                                                                       |
|---------------------------------------|------------------|--------|------------|------------|-----------|-------------|-----------------------------------------------------------------------|
| 7508                                  | At5g09660        | Q9ZP05 | 455        | 100        | 13        | micro       | malate dehydrogenase (NAD)                                            |
| 7707                                  | At3g02360        | Q9FWA3 | 542        | 100        | 17        | mem.        | 6-phosphogluconate dehydrogenase                                      |
| 7901                                  | At1g78570        | Q9SYM5 | 372        | 100        | 25        | unk         | NAD-dependent epimerase/dehydratase f (dTDP-glucose 4,6-dehydratase)  |
| Drought-UP; Heat-UP; Drought+Heat-DN  |                  |        |            |            |           |             |                                                                       |
| <b>2307</b>                           | <b>At3g23600</b> | Q9LUG8 | <b>73</b>  | <b>93</b>  | <b>7</b>  | <b>cyt</b>  | <b>dienelactone hydrolase</b>                                         |
| <b>2307</b>                           | <b>At5g02790</b> | Q9LZ06 | <b>152</b> | <b>100</b> | <b>13</b> | <b>unk</b>  | <b>In2-1 protein (glutathion S-transferase)</b>                       |
| Drought-NC; Heat-NC; Drought +Heat-DN |                  |        |            |            |           |             |                                                                       |
| 2904                                  | At3g19170        | Q9LJL3 | 411        | 100        | 32        | chl/mit     | Zinc metalloprotease pitrilysin subfamily A                           |
| 4703                                  | AtCg00490        | O03042 | 562        | 100        | 12        | chl.        | Rubisco large chain                                                   |
| 5906                                  | At5g17920        | O50008 | 547        | 100        | 25        | cyt         | ATCIMS (methionine synthase)                                          |
| 5907                                  | At5g17920        | O50008 | 542        | 100        | 28        | cyt         | ATCIMS (methionine synthase) (same as 5906)                           |
| <b>6601</b>                           | <b>At3g52880</b> | Q9LFA3 | <b>140</b> | <b>99</b>  | <b>12</b> | <b>per</b>  | <b>monodehydroascorbate reductase</b>                                 |
| 7505                                  | At2g36460        | Q9SJK9 | 254        | 100        | 13        | cyt         | fructose bisphosphate aldolase                                        |
| Drought-DN; Heat-DN; Drought+Heat-DN  |                  |        |            |            |           |             |                                                                       |
| 105                                   | At4g23670        | Q9SUR0 | 381        | 100        | 9         | cyt.        | major latex protein-related                                           |
| 301                                   | At3g12390        | Q9LHG9 | 80         | 98.6       | 5         | cyt.        | nascent polypeptide associated complex alpha chain protein,           |
| 403                                   | At4g24770        | Q04836 | 255        | 100        | 9         | chl.        | 31 kDa ribonucleoprotein                                              |
| 504                                   | At1g30230        | P48006 | 708        | 100        | 12        | cyt.        | elongation factor 1-beta / EF-1-beta                                  |
| 1503                                  | At1g23820        | Q9ZUB3 | 263        | 100        | 6         | cyt.        | spermidine synthase 1 (SPDSYN1) / putrescine aminopropyltransferase 1 |
| 1701                                  | AtCg00490        | O03042 | 502        | 100        | 14        | chl.        | Rubisco large chain                                                   |
| 3107                                  | At2g21660        | Q03250 | 184        | 100        | 8         | nuc         | ATGRP7 (Glycine-rich RNA-binding protein 7)                           |
| 4906                                  | At4g26970        | Q94A28 | 305        | 100        | 24        | mit         | aconitate hydratase                                                   |
| 4907                                  | AtCg00490        | O03042 | 498        | 100        | 20        | chl         | Rubisco LSU                                                           |
| <b>5301</b>                           | <b>At1g67090</b> | P10795 | <b>119</b> | <b>100</b> | <b>10</b> | <b>chl</b>  | <b>Rubisco SSU 1A</b>                                                 |
| <b>5301</b>                           | <b>At5g02240</b> | Q94EG6 | <b>278</b> | <b>100</b> | <b>13</b> | <b>mem</b>  | <b>expressed protein</b>                                              |
| <b>5805</b>                           | <b>At3g11830</b> | Q9SF16 | <b>138</b> | <b>100</b> | <b>14</b> | <b>cyt.</b> | <b>chaperonin similar to T-complex protein 1, eta subunit</b>         |
| <b>5805</b>                           | <b>At4g00570</b> | Q8L7K9 | <b>286</b> | <b>100</b> | <b>18</b> | <b>mit.</b> | <b>Malate oxidoreductase</b>                                          |
| 6304                                  | At2g30860        | O80852 | 727        | 100        | 15        | cyt.        | Glutathione S-transferase                                             |
| 6308                                  | At2g30860        | O80852 | 87         | 99.7       | 2         | cyt.        | Glutathione S-transferase                                             |
| 6503                                  | At2g01140        | Q9ZU52 | 254        | 100        | 8         | chl./mit.   | fructose-bisphosphate aldolase                                        |
| 6504                                  | At3g26650        | P25856 | 99         | 99.9       | 9         | chl         | glyceraldehyde 3-phosphate dehydrogenase A                            |
| 6716                                  | At3g54400        | Q9M2U7 | 102        | 100        | 5         | mem.        | Nucleoid DNA-binding-like protein                                     |
| 7203                                  | At5g10860        | Q9LEV3 | 351        | 100        | 13        | mit.        | CBS domain-containing protein                                         |
| 7304                                  | At1g56450        | Q7DLR9 | 128        | 100        | 4         | cyt.        | 20S proteasome beta subunit (PBG1)                                    |
| 7609                                  | At3g08030        | Q9SFB1 | 411        | 100        | 18        | unk         | expressed protein                                                     |
| 7611                                  | At5g11420        | Q9LYE7 | 310        | 100        | 16        | mem         | expressed protein                                                     |
| <b>8001</b>                           | <b>At1g03600</b> | Q9LR64 | <b>82</b>  | <b>99</b>  | <b>4</b>  | <b>chl</b>  | <b>photosystem II family protein</b>                                  |
| <b>8001</b>                           | <b>At4g05180</b> | Q41932 | <b>168</b> | <b>100</b> | <b>9</b>  | <b>chl</b>  | <b>16 kDa Oxygen-evolving protein (OEE3)</b>                          |
| 8610                                  | At1g29670        | Q9C7N4 | 288        | 100        | 13        | mem         | GDSL-motif lipase/hydrolase                                           |

|                                      |                  |        |            |            |           |                  |                                                                        |
|--------------------------------------|------------------|--------|------------|------------|-----------|------------------|------------------------------------------------------------------------|
| 8612                                 | AT3g14420        | Q9LRR9 | 375        | 100        | 20        | unk              | glycolate oxidase                                                      |
| 9801                                 | AtCg00490        | O03042 | 616        | 23         | 24        | chl              | Rubisco LSU                                                            |
| Drought-UP; Heat-UP; Drought+Heat-NC |                  |        |            |            |           |                  |                                                                        |
| 2306                                 | At1g06680        | Q42029 | 289        | 100        | 7         | chl              | Oxygen-evolving enhancer protein 2 (OEE2/PsbP)                         |
| 6702                                 | AtCg00490        | O03042 | 124        | 100        | 7         | chl              | Rubisco LSU                                                            |
| Drought-DN; Heat-UP; Drought+Heat-UP |                  |        |            |            |           |                  |                                                                        |
| 6103                                 | At5g59720        | P19037 | 136        | 100        | 9         | unk              | Heat shock protein 18                                                  |
| Drought-NC; Heat-DN; Drought+Heat-DN |                  |        |            |            |           |                  |                                                                        |
| 8108                                 | At4g05180        | Q41932 | 483        | 100        | 16        | chl              | Oxygen-evolving enhancer protein 3 (OEE3/PsbQ)                         |
| <b>8402</b>                          | <b>At4g30270</b> | P24806 | <b>123</b> | <b>100</b> | <b>8</b>  | <b>cell wall</b> | <b>MERI5B endo-xyloglucan transferase</b>                              |
| <b>8402</b>                          | <b>At4g30270</b> | P24806 | <b>409</b> | <b>100</b> | <b>13</b> | <b>cyt.</b>      | <b>MERI5B endo-xyloglucan transferase</b>                              |
| Drought-DN; Heat-UP; Drought+Heat-DN |                  |        |            |            |           |                  |                                                                        |
| 411                                  | At4g24770        | Q04836 | 385        | 100        | 13        | chl              | cp31 RNA-binding protein RNP-T                                         |
| 9108                                 | At1g67090        | P10795 | 359        | 100        | 10        | chl              | Rubisco SSU 1A                                                         |
| Drought-UP; Heat-NC; Drought+Heat-NC |                  |        |            |            |           |                  |                                                                        |
| 1405                                 | At5g38480        | P42644 | 138        | 100        | 5         | cyt.             | 14-3-3-like protein GF14 psi (General regulatory factor 3)             |
| 2706                                 | AtCg00490        | O03042 | 85         | 99.6       | 3         | chl.             | Rubisco large chain                                                    |
| <b>3105</b>                          | <b>At2g28190</b> | O78310 | <b>383</b> | <b>100</b> | <b>6</b>  | <b>chl</b>       | <b>Superoxide dismutase [Cu-Zn]</b>                                    |
| <b>3105</b>                          | <b>At3g62030</b> | P34791 | <b>212</b> | <b>100</b> | <b>12</b> | <b>chl</b>       | <b>Peptidyl-prolyl cis-trans isomerase (CYP20-3)</b>                   |
| <b>4302</b>                          | <b>At2g30870</b> | P42761 | <b>106</b> | <b>99</b>  | <b>9</b>  | <b>cyt</b>       | <b>glutathione transferase</b>                                         |
| <b>4302</b>                          | <b>At3g01500</b> | P27140 | <b>329</b> | <b>100</b> | <b>12</b> | <b>chl</b>       | <b>carbonic anhydrase 1 (CA1)</b>                                      |
| <b>4507</b>                          | <b>At1g53240</b> | Q9ZP06 | <b>226</b> | <b>100</b> | <b>7</b>  | <b>mit</b>       | <b>malate dehydrogenase (NAD)</b>                                      |
| <b>4507</b>                          | <b>At4g14880</b> | P47998 | <b>130</b> | <b>100</b> | <b>7</b>  | <b>cyt</b>       | <b>cysteine synthase</b>                                               |
| Drought-NC; Heat-UP;Drought+Heat-NC  |                  |        |            |            |           |                  |                                                                        |
| 6809                                 | At5g17920        | O50008 | 203        | 100        | 11        | cyt.             | 5-methyltetrahydropteroyltriglutamate-homocysteine S-methyltransferase |
| <b>9601</b>                          | <b>At1g29670</b> | Q9C7N4 | <b>318</b> | <b>100</b> | <b>13</b> | <b>mem</b>       | <b>GDSL-motif lipase/hydrolase</b>                                     |
| <b>9601</b>                          | <b>At3g14420</b> | Q9LRR9 | <b>113</b> | <b>100</b> | <b>11</b> | <b>unk</b>       | <b>glycolate oxidase</b>                                               |



**Supplementary Table 2.** Proteins that specifically accumulate in plants during a combination of drought and heat stress.

| Spot    | Gene      | Score | Conf.  | Pep. | Local. | Protein                                                | array fold change (log) |
|---------|-----------|-------|--------|------|--------|--------------------------------------------------------|-------------------------|
| 107/108 | At4g39730 | 93    | 99     | 5    | chl    | lipid-associated family protein                        | 0.85                    |
| 202     | At5g37780 | 137   | 100    | 6    | unk    | calmodulin-1/4 (CAM1)                                  | 0.75                    |
| 1101    | At1g32470 | 204   | 100    | 5    | mit    | glycine cleavage system H protein                      | -0.5                    |
| 1101    | At2g22170 | 142   | 100    | 6    | cyt    | lipid-associated family protein,                       | -2.4                    |
| 1601    | At5g10760 | 149   | 100    | 8    | mem    | aspartyl protease family protein                       | -2.2                    |
| 1707    | At3g54050 | 251   | 100    | 11   | chl    | Fructose-1,6-bisphosphatase                            | -0.4                    |
| 1904    | At4g24280 | 424   | 100    | 18   | chl    | HSP70                                                  | 2.10                    |
| 2004    | At1g67040 | 231   | 100    | 6    | cyt    | expressed protein                                      | NC                      |
| 2301    | At3g04790 | 161   | 100    | 5    | chl    | ribose 5-phosphate isomerase-related                   | -1.8                    |
| 2304    | At3g23600 | 93    | 99     | 7    | cyt    | dienelactone hydrolase                                 | -0.7                    |
| 2605    | At3g12780 | 75    | 96     | 8    | mit    | phosphoglycerate kinase                                | -0.3                    |
| 2801    | At2g28000 | 467   | 100    | 26   | chl    | Cpn60                                                  | 1.50                    |
| 2808    | AtCg00120 | 753   | 100    | 24   | chl    | ATP synthase $\alpha$ chain                            | -2.7                    |
| 3108    | At2g21660 | 409   | 100    | 11   | nuc    | Glycine-rich RNA binding protein ATGRP7                | 0.95                    |
| 3203    | At3g14210 | 75    | 95     | 5    | er     | Lipase/acylhydrolase; myrosinase-associated protein    | NC                      |
| 3203    | At5g16450 | 106   | 100    | 7    | er     | dimethylmenaquinone methyltransferase                  | -1.0                    |
| 3204    | At2g43560 | 229   | 100    | 9    | chl    | Probable FKBP-type peptidyl-prolyl cis-trans isomerase | -1.8                    |
| 3205    | At1g06680 | 265   | 100    | 9    | chl    | Oxygen-evolving enhancer protein 2 (OEE2/PsbP/OE23)    | NC                      |
| 3209    | At3g25770 | 326   | 100    | 10   | chl    | allene oxide cyclase AOC3                              | NC                      |
| 3209    | At5g20630 | 138   | 100    | 2    | ext    | germin-like protein 3 GLP3                             | -2.5                    |
| 3709    | AtCg00480 | 513   | 100    | 18   | chl    | ATP synthase $\beta$ -subunit                          | NC                      |
| 3803    | At5g26000 | 137   | 100    | 13   | mem    | glycosyl hydrolase family 1 protein                    | NC                      |
| 3804    | At1g55490 | 247   | 100    | 15   | chl    | CPN60                                                  | 1.25                    |
| 3806    | At5g26000 | 427   | 100    | 21   | mem    | glycosyl hydrolase family 1 protein                    | -0.4                    |
| 4305    | At1g07890 | 307   | 100    | 10   | cyt    | ascorbate peroxidase 1 APX1                            | 0.60                    |
| 4305    | At1g09130 | 84    | 99.367 | 7    | chl    | ClpR3                                                  | 0.45                    |
| 4307    | At1g07890 | 152   | 100    | 9    | cyt    | ascorbate peroxidase 1 APX1                            | 0.60                    |
| 4504    | At1g75280 | 180   | 100    | 13   | cyt    | isoflavone reductase                                   | 0.85                    |
| 4504    | At2g43750 | 257   | 100    | 13   | chl    | cysteine synthase                                      | NC                      |
| 4504    | At3g47520 | 110   | 99.999 | 10   | chl    | NAD-dependent malate dehydrogenase                     | NC                      |

|      |           |     |     |    |         |                                                                         |       |
|------|-----------|-----|-----|----|---------|-------------------------------------------------------------------------|-------|
| 4509 | At3g47520 | 249 | 100 | 14 | chl     | NAD-dependent malate dehydrogenase                                      | NC    |
| 4605 | At4g23600 | 241 | 100 | 18 | mem     | Cystine lyase CORI3                                                     | 0.80  |
| 4802 | At3g16850 | 77  | 97  | 5  | mem     | glycoside hydrolase family 28 protein / polygalacturonase (pectinase)   | -1.5  |
| 4805 | At3g16850 | 82  | 99  | 8  | mem     | glycoside hydrolase family 28 protein / polygalacturonase (pectinase)   | -1.5  |
| 4805 | At4g34200 | 205 | 100 | 18 | chl     | D-3-phosphoglycerate dehydrogenase 3-PGDH                               | NC    |
| 4809 | At5g11670 | 227 | 100 | 16 | cyt     | malic enzyme 2 NADP-ME2                                                 | -1.0  |
| 5307 | At3g01500 | 312 | 100 | 12 | chl     | carbonic anhydrase 1 CA1                                                | -0.85 |
| 5702 | At1g23310 | 594 | 100 | 29 | cyt     | glutamate:glyoxylate aminotransferase 1 GGT1                            | 0.85  |
| 6008 | At5g20620 | 431 | 100 | 10 | cyt     | polyubiquitin (UBQ4)                                                    | 1.80  |
| 6102 | At3g17020 | 250 | 100 | 11 | mem     | universal stress protein (USP), similar to ENOD18 ( <i>Vicia faba</i> ) | 0.60  |
| 6511 | At1g13440 | 248 | 100 | 9  | cyt/mit | glyceraldehyde 3-phosphate dehydrogenase                                | NC    |
| 6602 | At1g13440 | 464 | 100 | 17 | cyt/mit | glyceraldehyde 3-phosphate dehydrogenase                                | NC    |
| 6604 | At3g14210 | 146 | 100 | 12 | mem     | myrosinase-associated protein                                           | NC    |
| 7405 | At3g12500 | 194 | 100 | 5  | mem     | Class I chitinase (Fragment)                                            | NC    |
| 8304 | At3g11780 | 98  | 99  | 3  | unk     | MD-2-related lipid recognition domain-containing protein                | -0.75 |

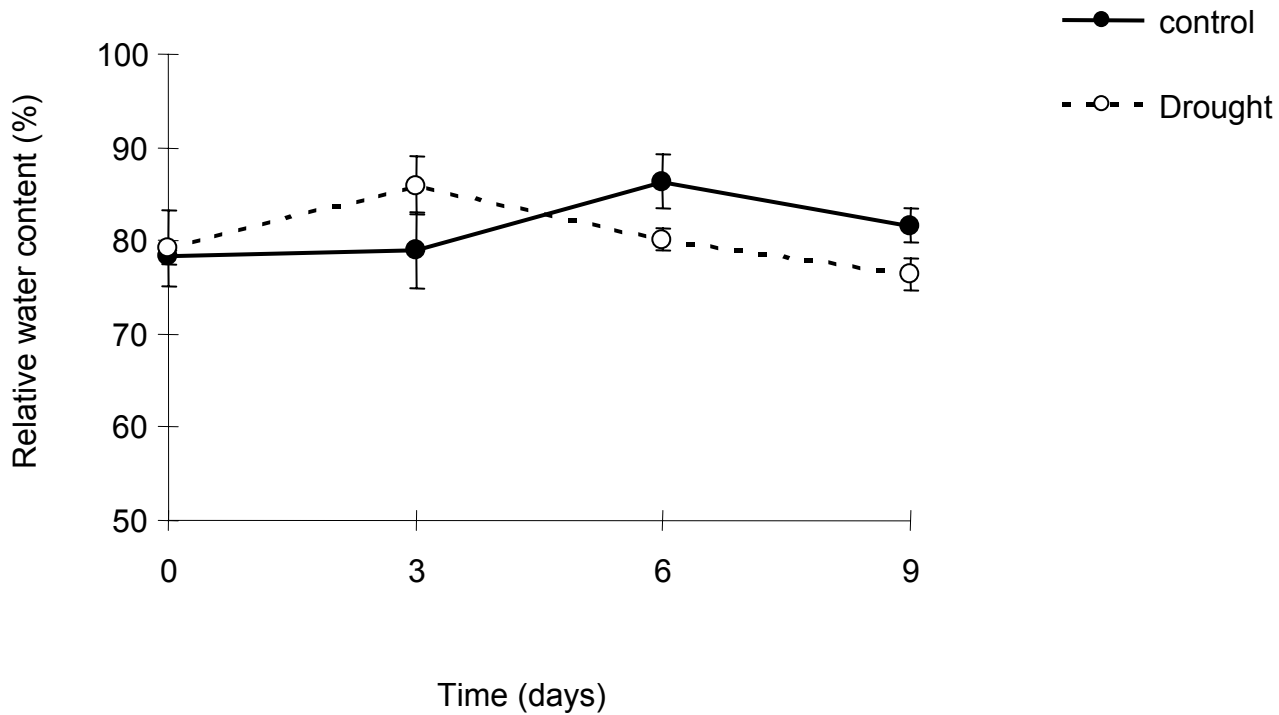

**Figure S1.** Relative water content of Arabidopsis leaves after water withholding

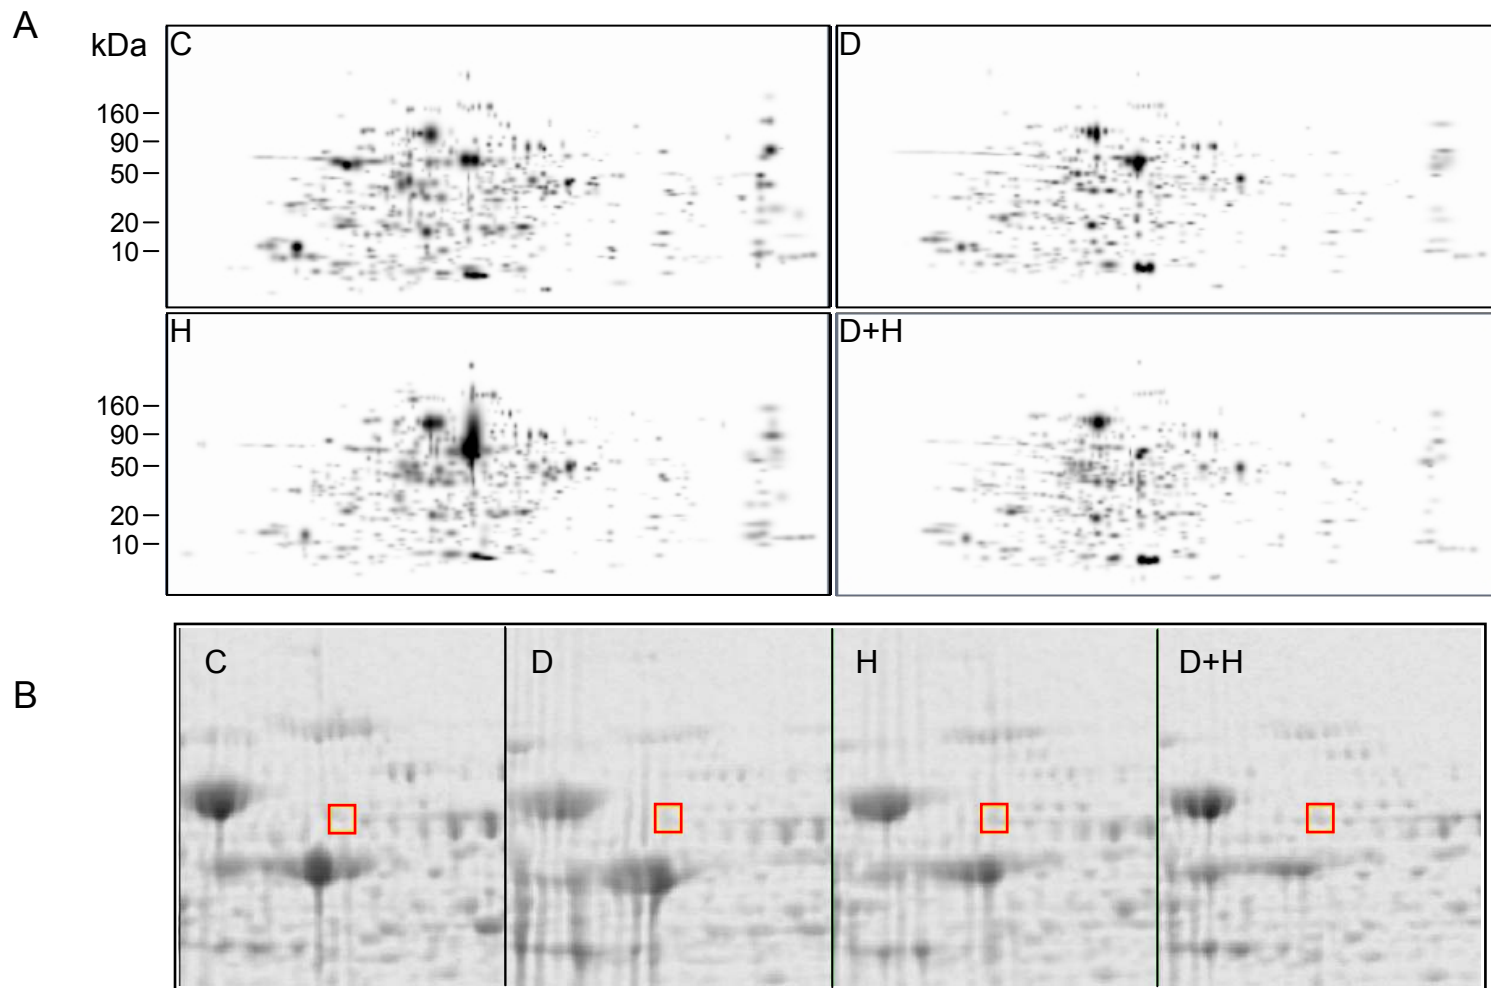

**Figure S2.** A. Two-dimensional gels of *Arabidopsis* soluble proteins obtained from control (C), drought-stressed (D), heat-stressed (H), or plants subjected to a combination of drought and heat stress (D+H). Proteins were first separated on a pH 3-10 IEF strip and then ran on a 4-20% SDS-PAGE. Images presented are gels created *in silico* by matching three replicate gels for each treatment. B. Magnification of two-dimensional gels depicting spot number 4809 containing ME2. Gels shown are one replication out of three for control, drought, heat or drought and heat combination gels.

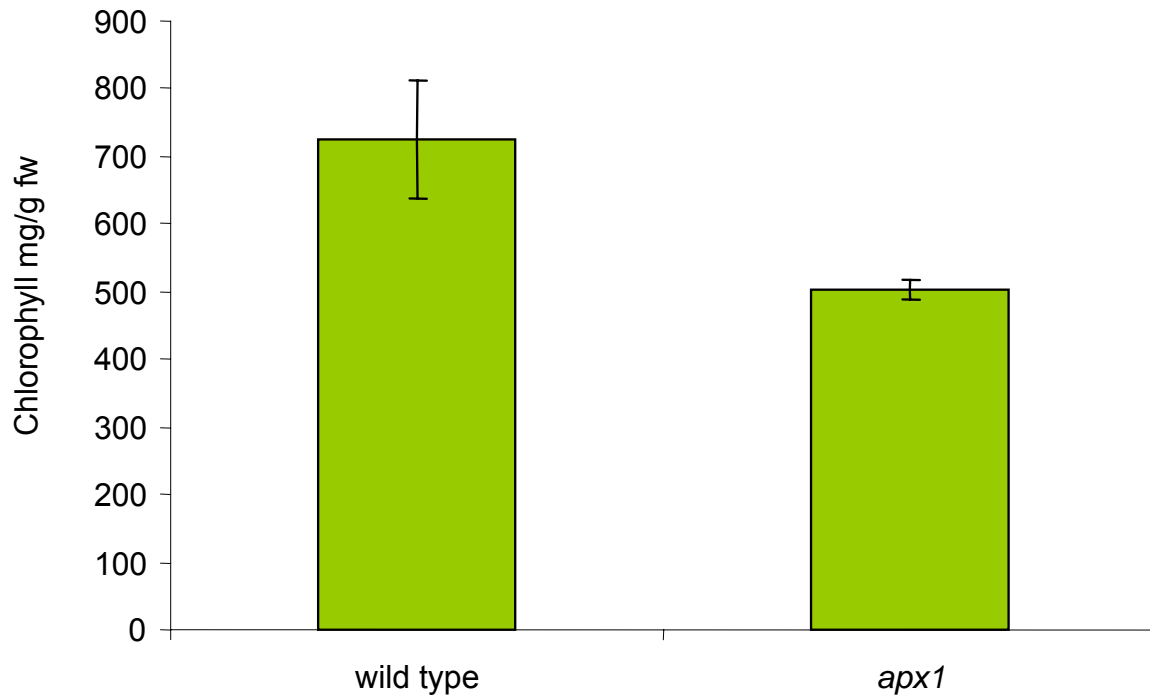

**Figure S3.** Chlorophyll concentration in wild type and *apx1* seedlings 1 week after a combined heat and drought stress.

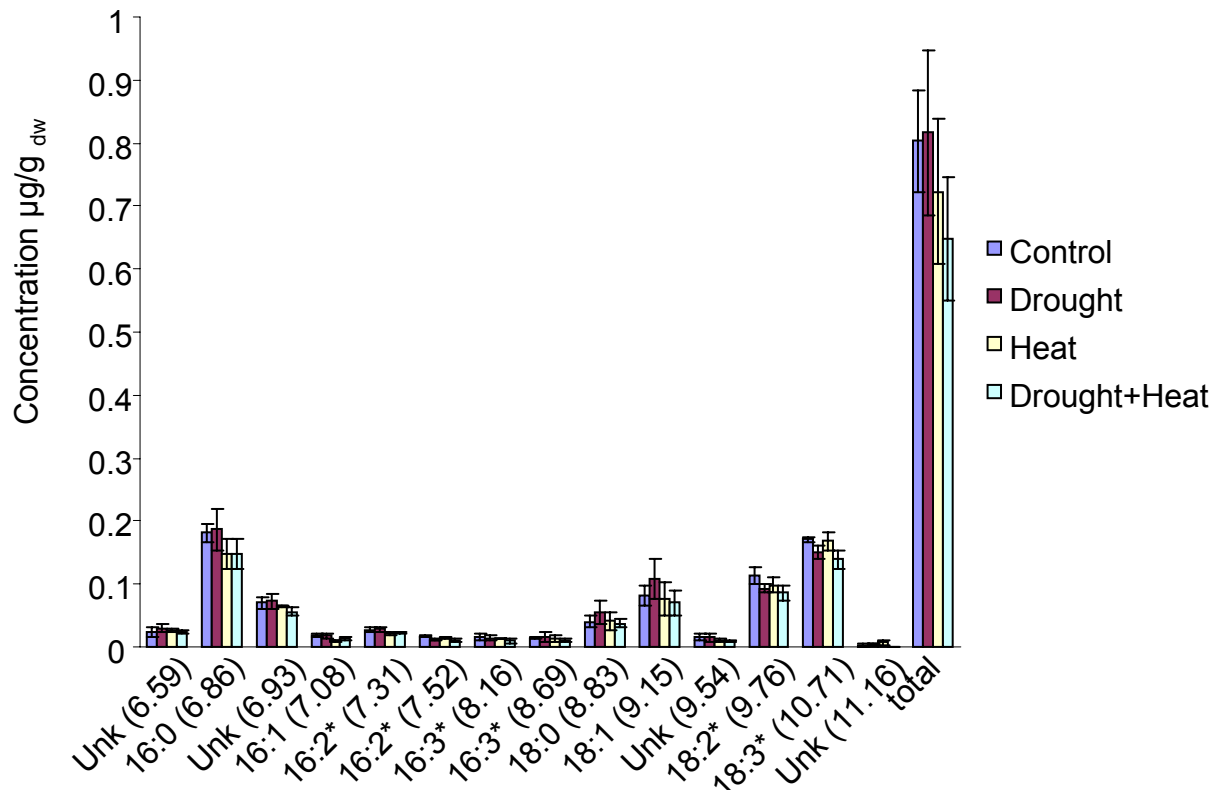

**Figure S4.** Accumulation of fatty acids in plants in response to drought, heat, or a combination of drought and heat. Numbers in parenthesis are the retention times for each compound, \* indicates fatty acids that were identified only by a data base search, unk – unknown compounds that are likely fatty acids (based on mass spec).

For fatty acids determination, 50 mg tissue was ground in 2 ml of 50 mM Hepes (pH 7.9), 3 mM MgCl and added to a 1:2.5 mixture of chloroform/methanol solution containing 0.02% butylated hydroxytoluene, 250 ng of heptadecanoic acid (C17) were added to each sample as standard. Ratio of chloroform/methanol/buffer was adjusted until a strong emulsion developed. After centrifugation at 2000 rpm for 5 min the chloroform fraction was transferred to a new tube and evaporated with N<sub>2</sub>. Fatty acid methyl esters (FAME's) were prepared by re-suspending the dried fatty acids in 1.5 ml BF<sub>3</sub> in methanol, aerating in N<sub>2</sub>, capping and heating to 55°C for 15 min. After samples were cooled 3 ml of petroleum ether were added and after vortex the top layer was transferred to a new tube containing a drying reagent (Na<sub>2</sub>SO<sub>4</sub>/NaHCO<sub>3</sub> 1:1 w/w) to remove methanol and neutralize the BF<sub>3</sub>. Samples were then dried to completeness under a stream of N<sub>2</sub>. The FAME's were reconstituted in 200 µl of carbon disulfide and placed into auto sampler vials with 250 µl inserts prior to mass spectral analysis. The GC-MS analysis was conducted on a Trace (ThermoFinnigan, San Jose; CA) GC interfaced with a Polaris Q ion trap mass spectrometer (ThermoFinnigan, San Jose; CA). The FAME's were separated using a 60 meter HP-INNOWAX column with an I.D. of 0.25 mm and 0.25 µm film thickness. The oven was set at an initial temperature of 200° C and immediately ramped up to 240° C at a rate of 5° C/min and then held at the final temperature for 30 minutes. The mass spectrometer was used in EI mode at 70eV with a scan range of 40 – 450 m/z with an ion source temperature of 200° C. Sample identification was done using authentic standards and the NIST2002 library.

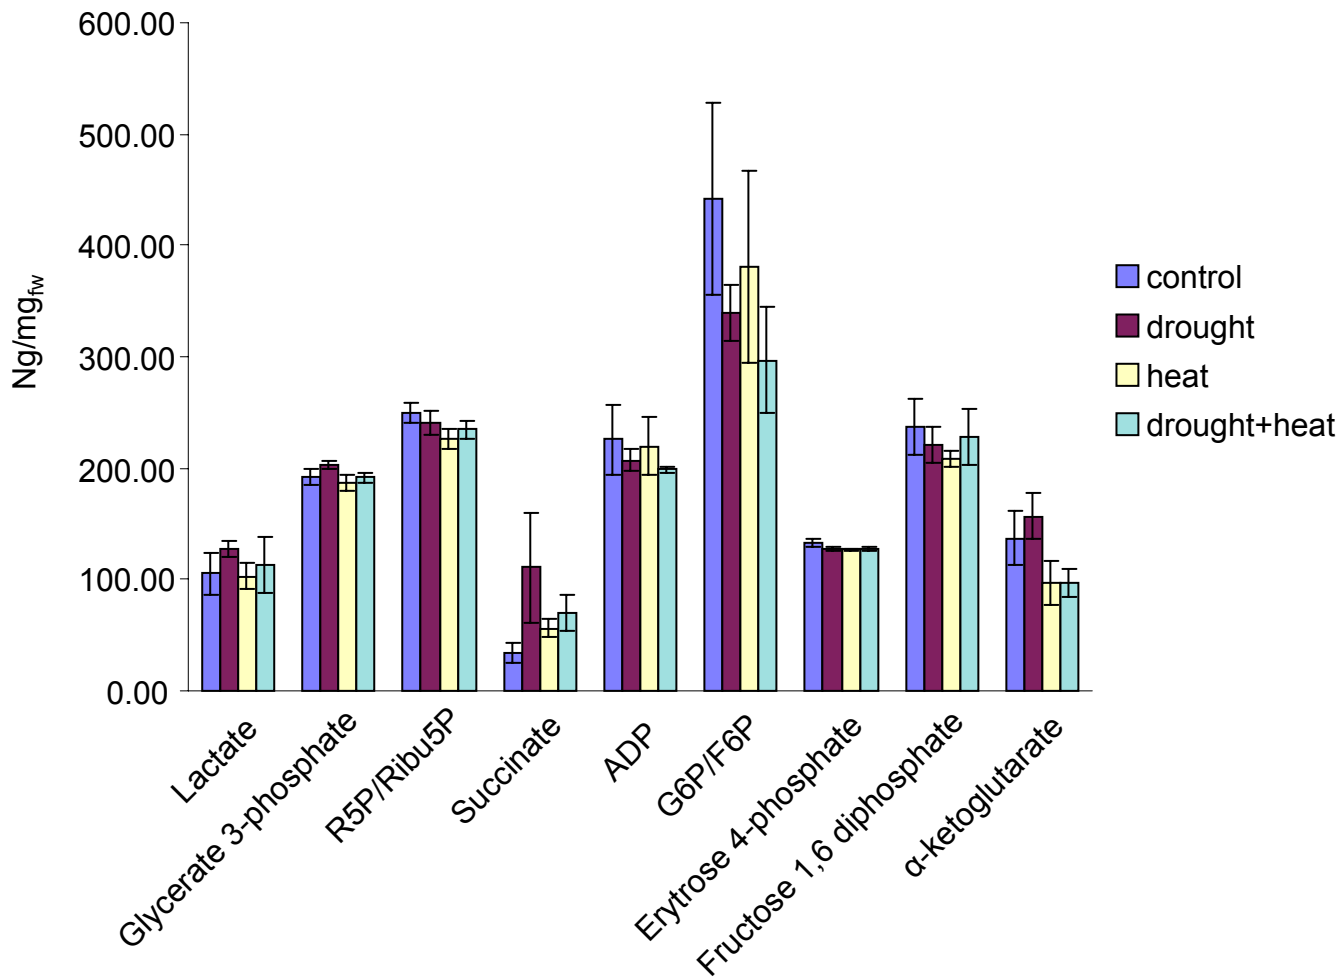

**Figure S5.** Accumulation of metabolites in plants in response to drought, heat, or a combination of drought and heat.
